# Supplementary material
Source: PubMed Central journal article supplement (PMC3931013)
Supplement: NIHMS552613-supplement-supp_legends.pdf [file NIHMS552613-supplement-supp_legends.pdf]

Figure S1. Chemical structure of selumetinib (AZD6244).

**Figure S2.** Effects of FZD2 knockdown on HCT-116 cell proliferation in response to AZD6244. (A) HCT-116 cells stably expressing shRNA constructs against FZD2 were exposed to increasing doses of AZD6244 and assessed for proliferation using the SRB method. (n=9 per cell line). (B) Quantification of effects of FZD2 knockdown on proliferation of HCT-116 cells at 0.312  $\mu$ M AZD6244. (C) shRNA knockdown of FZD2 in HCT-116 cells was confirmed by qRT-PCR.
