# Supplementary material
Source: PubMed Central journal article supplement (PMC3931013)

Figure S1

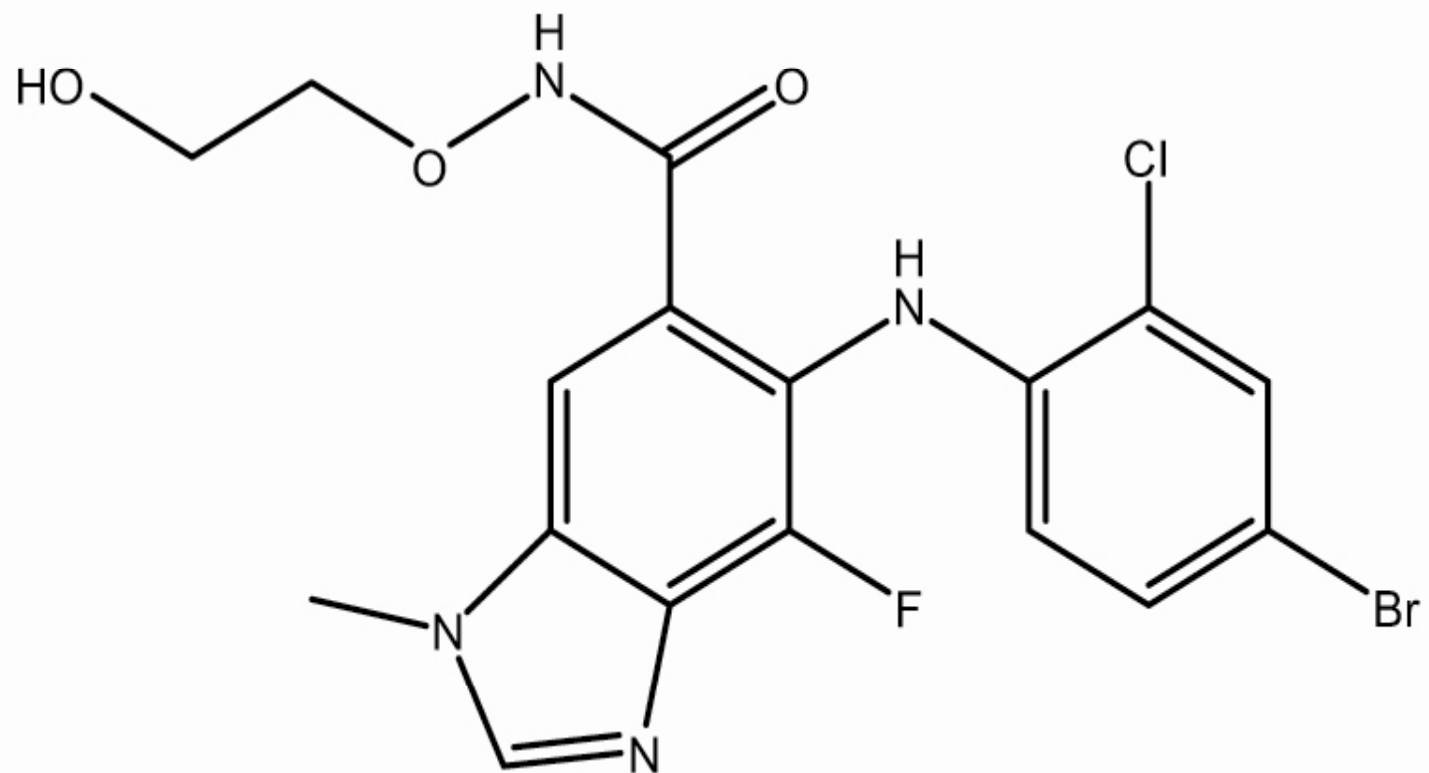

Supplement: NIHMS552613-supplement-supp_fig_1.pdf [file NIHMS552613-supplement-supp_fig_1.pdf]

Figure S2

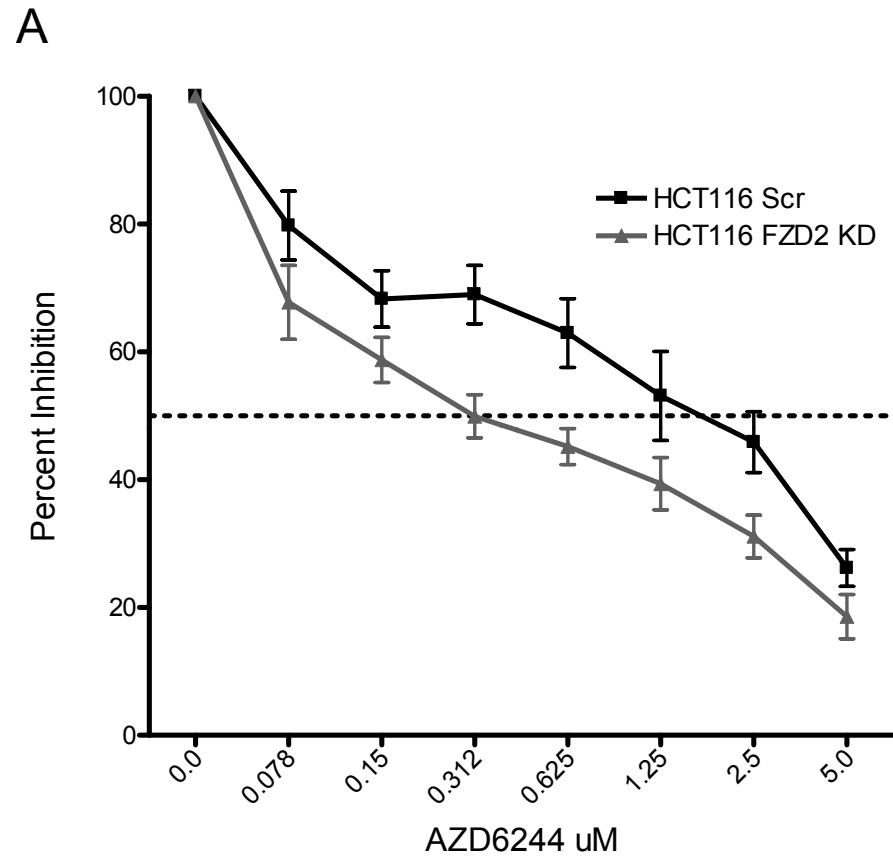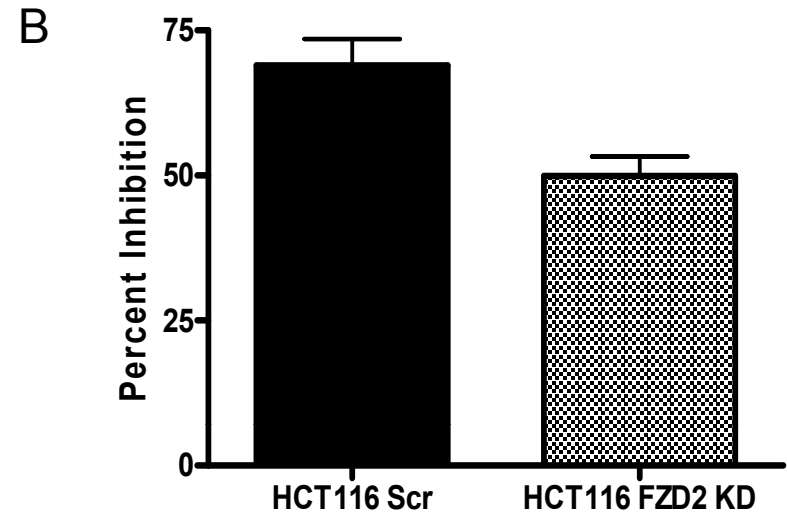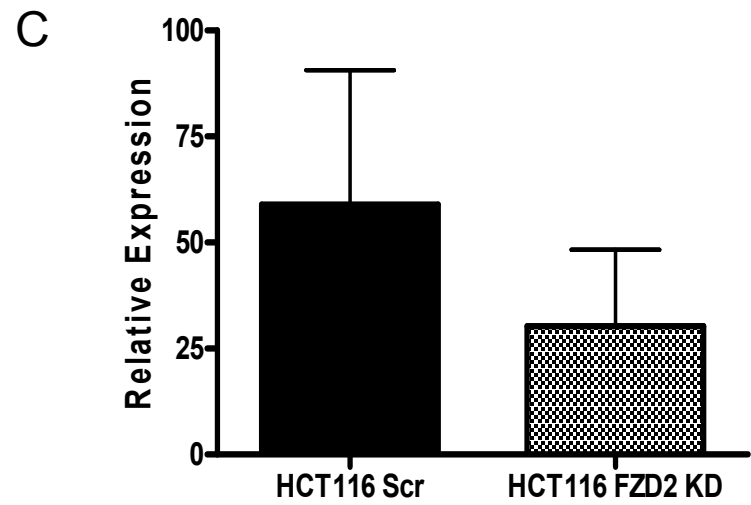

Supplement: NIHMS552613-supplement-supp_fig_2.pdf [file NIHMS552613-supplement-supp_fig_2.pdf]
